# Supplementary material for: Carcass Yields and Meat Composition of Male and Female Italian Slow-Growing Chicken Breeds: Bianca di Saluzzo and Bionda Piemontese
Source: MDPI journal article supplement (doi:10.3390/ani12030406), 2022-02-08
Supplement: s1 [file s1]

## Article

# Carcass Yields and Meat Composition of Male and Female Italian Slow-Growing Chicken Breeds: *Bianca di Saluzzo* and *Bionda Piemontese*

Valentina Bongiorno<sup>1</sup>, Achille Schiavone<sup>1</sup>, Manuela Renna<sup>1</sup>, Stefano Sartore<sup>1</sup>, Dominga Soglia<sup>1</sup>, Paola Sacchi<sup>1</sup>, Marta Gariglio<sup>1\*</sup>, Annelisse Castillo<sup>1</sup>, Cecilia Mugnai<sup>1</sup>, Claudio Forte<sup>1</sup>, Chiara Bianchi<sup>1</sup>, Silvia Mioletti<sup>1</sup>, Laura Gasco<sup>2</sup>, Ilaria Biasato<sup>2</sup>, Alberto Brugiapaglia<sup>2</sup>, Federico Sirri<sup>3</sup>, Marco Zampiga<sup>3</sup>, Francesco Gai<sup>4</sup>, Margherita Marzoni<sup>5</sup>, Silvia Cerolini<sup>6</sup>, Sihem Dabbou<sup>7</sup>

<sup>1</sup>Department of Veterinary Sciences, University of Torino, 10095 Grugliasco, TO, Italy; valentina.bongiorno@unito.it (V.B.); achille.schiavone@unito.it (A.S.); manuela.renna@unito.it (M.R.); stefano.sartore@unito.it (S.S.); dominga.soglia@unito.it (D.S.); paola.sacchi@unito.it (P.S.); annelisse.castillogarrido@unito.it (A.C.); cecilia.mugnai@unito.it (C.M.); claudio.forte@unito.it (C.F.); chiara.bianchi@unito.it (C.B.); silvia.mioletti@unito.it (S.M.)

<sup>2</sup>Department of Agricultural, Forest and Food Sciences, University of Torino, 10095 Grugliasco, TO, Italy; laura.gasco@unito.it (L.G.); ilaria.biasato@unito.it (I.B.); alberto.brugiapaglia@unito.it (A.B.)

<sup>3</sup>Department of Agricultural and Food Sciences, Alma Mater Studiorum – University of Bologna, Ozzano dell'Emilia, 40064 Bologna, BO, Italy; federico.sirri@unibo.it (F.S.); marco.zampiga2@unibo.it (M.Z.)

<sup>4</sup>Institute of Science of Food Production, National Research Council, 10095 Grugliasco, TO, Italy; francesco.gai@ispa.cnr.it (F.G.)

<sup>5</sup>Department of Veterinary Sciences, University of Pisa, 56124 Pisa, PI, Italy; margherita.marzoni@unipi.it (M.M.)

<sup>6</sup>Department of Veterinary Medicine, University of Milano, 26900 Lodi, LO, Italy; silvia.cerolini@unimi.it (S.C.)

<sup>7</sup>Center Agriculture Food Environment (C3A), University of Trento, 38010 San Michele all'Adige, TN Italy; sihem.dabbou@unitn.it (S.D.)

\*Correspondence: marta.gariglio@unito.it

## Supplementary materials

**Table S1.** Slaughter yields of *Bionda Piemontese* and *Bianca di Saluzzo* breeds at different slaughter ages (n = 8).

| Items                | Age at slaughter | <i>Bionda Piemontese</i> |                     | <i>Bianca di Saluzzo</i> |                     | SEM   | <i>p</i> -value |        |
|----------------------|------------------|--------------------------|---------------------|--------------------------|---------------------|-------|-----------------|--------|
|                      |                  | Male                     | Female              | Male                     | Female              |       | Breed           | Gender |
| Carcass yield (% SW) | 5 months         | 60.03                    | 60.47               | 57.96                    | 59.03 <sup>a</sup>  | 0.431 | 0.028           | 0.326  |
|                      | 6 months         | 60.58                    | 59.33               | 59.38                    | 57.58 <sup>ab</sup> | 0.490 | 0.131           | 0.119  |
|                      | 7 months         | 61.58                    | 57.54               | 59.20                    | 54.21 <sup>bc</sup> | 0.761 | 0.029           | 0.001  |
|                      | 8 months         | 58.92                    | 56.78               | 57.22                    | 52.72 <sup>c</sup>  | 0.678 | 0.017           | 0.007  |
| <i>p</i> -value      |                  | 0.080                    | 0.083               | 0.122                    | 0.020               |       |                 |        |
| Breast yield (%CC)   | 5 months         | 16.16 <sup>b</sup>       | 19.09 <sup>a</sup>  | 17.76 <sup>a</sup>       | 19.02 <sup>b</sup>  | 0.285 | 0.064           | <0.001 |
|                      | 6 months         | 15.45 <sup>b</sup>       | 17.39 <sup>c</sup>  | 15.65 <sup>b</sup>       | 16.87 <sup>c</sup>  | 0.228 | 0.658           | <0.001 |
|                      | 7 months         | 17.50 <sup>a</sup>       | 18.92 <sup>bc</sup> | 17.72 <sup>a</sup>       | 19.63 <sup>ab</sup> | 0.290 | 0.371           | 0.003  |
|                      | 8 months         | 18.09 <sup>a</sup>       | 20.99 <sup>a</sup>  | 17.91 <sup>a</sup>       | 20.67 <sup>a</sup>  | 0.324 | 0.556           | <0.001 |
| <i>p</i> -value      |                  | <0.001                   | 0.002               | 0.002                    | <0.001              |       |                 |        |
| Thigh yield (%CC)    | 5 months         | 38.89                    | 33.23               | 38.56                    | 32.67               | 0.626 | 0.544           | <0.001 |
|                      | 6 months         | 39.03                    | 32.46               | 38.41                    | 31.59               | 0.654 | 0.118           | <0.001 |
|                      | 7 months         | 38.51                    | 32.17               | 38.93                    | 32.25               | 0.621 | 0.573           | <0.001 |
|                      | 8 months         | 39.95                    | 32.41               | 39.96                    | 32.39               | 0.714 | 0.989           | <0.001 |
| <i>p</i> -value      |                  | 0.385                    | 0.513               | 0.230                    | 0.480               |       |                 |        |

Abbreviations: SW: slaughter weight; CC: chilled carcass weight; SEM: standard error of the mean; values with different superscript letters (a, b, c) within the same column per fixed effect (age of slaughter) differ significantly ( $p < 0.05$ ). The effect of interaction between “Breed” and “Gender” was not significant; therefore, significance is only presented for main effects.

**Table S2.** Meat quality parameters of breast and thigh muscles at different slaughter ages (n = 8).

| Items           | Age at slaughter | <i>Bionda Piemontese</i> |                    | <i>Bianca di Saluzzo</i> |                    | SEM   | <i>p-value</i> |        |
|-----------------|------------------|--------------------------|--------------------|--------------------------|--------------------|-------|----------------|--------|
|                 |                  | Male                     | Female             | Male                     | Female             |       | Breed          | Gender |
| pH breast       | 5 months         | 6.21                     | 6.10 <sup>b</sup>  | 6.34                     | 6.15 <sup>c</sup>  | 0.035 | 0.189          | 0.034  |
|                 | 6 months         | 6.18                     | 6.25 <sup>b</sup>  | 6.21                     | 6.24 <sup>ab</sup> | 0.019 | 0.823          | 0.187  |
|                 | 7 months         | 6.22                     | 6.45 <sup>a</sup>  | 6.22                     | 6.21 <sup>c</sup>  | 0.031 | 0.034          | 0.052  |
|                 | 8 months         | 6.21                     | 6.24 <sup>b</sup>  | 6.31                     | 6.35 <sup>a</sup>  | 0.037 | 0.185          | 0.650  |
| <i>p-value</i>  |                  | 0.974                    | 0.002              | 0.512                    | 0.015              |       |                |        |
| pH thigh        | 5 months         | 6.21                     | 6.10 <sup>b</sup>  | 6.34                     | 6.15 <sup>c</sup>  | 0.035 | 0.189          | 0.034  |
|                 | 6 months         | 6.18                     | 6.25 <sup>b</sup>  | 6.21                     | 6.24 <sup>ab</sup> | 0.019 | 0.823          | 0.187  |
|                 | 7 months         | 6.22                     | 6.45 <sup>a</sup>  | 6.22                     | 6.21 <sup>c</sup>  | 0.031 | 0.034          | 0.052  |
|                 | 8 months         | 6.21                     | 6.24 <sup>b</sup>  | 6.31                     | 6.35 <sup>a</sup>  | 0.037 | 0.185          | 0.650  |
| <i>p-value</i>  |                  | 0.974                    | 0.002              | 0.512                    | 0.015              |       |                |        |
| Breast meat     |                  |                          |                    |                          |                    |       |                |        |
| Lightness (L*)  | 5 months         | 51.69                    | 53.98              | 52.54 <sup>a</sup>       | 53.66              | 0.514 | 0.800          | 0.108  |
|                 | 6 months         | 50.10                    | 53.15              | 50.98 <sup>a</sup>       | 54.45              | 0.503 | 0.200          | 0.001  |
|                 | 7 months         | 52.96                    | 55.05              | 53.47 <sup>a</sup>       | 54.03              | 0.403 | 0.750          | 0.106  |
|                 | 8 months         | 50.12                    | 53.42              | 47.55 <sup>b</sup>       | 54.36              | 0.644 | 0.366          | <0.001 |
| <i>p-value</i>  |                  | 0.102                    | 0.447              | <0.001                   | 0.931              |       |                |        |
| Redness (a*)    | 5 months         | -0.23 <sup>c</sup>       | -1.64 <sup>b</sup> | -0.30 <sup>b</sup>       | -1.95 <sup>b</sup> | 0.221 | 0.608          | <0.001 |
|                 | 6 months         | 1.24 <sup>b</sup>        | 0.32 <sup>a</sup>  | 0.26 <sup>b</sup>        | -0.13 <sup>a</sup> | 0.278 | 0.205          | 0.248  |
|                 | 7 months         | 2.01 <sup>b</sup>        | -0.17 <sup>a</sup> | 1.17 <sup>b</sup>        | -0.68 <sup>a</sup> | 0.264 | 0.089          | <0.001 |
|                 | 8 months         | 4.55 <sup>a</sup>        | 1.28 <sup>a</sup>  | 4.48 <sup>a</sup>        | 0.32 <sup>a</sup>  | 0.416 | 0.314          | <0.001 |
| <i>p-value</i>  |                  | <0.001                   | 0.003              | <0.001                   | 0.001              |       |                |        |
| Yellowness (b*) | 5 months         | 7.95                     | 9.23               | 7.68 <sup>ab</sup>       | 7.68               | 0.274 | 0.092          | 0.231  |
|                 | 6 months         | 7.99                     | 11.01              | 6.24 <sup>b</sup>        | 9.74               | 0.418 | 0.012          | <0.001 |
|                 | 7 months         | 8.35                     | 10.06              | 9.54 <sup>a</sup>        | 9.67               | 0.394 | 0.619          | 0.260  |
|                 | 8 months         | 10.18                    | 11.29              | 8.96 <sup>a</sup>        | 10.33              | 0.426 | 0.206          | 0.151  |
| <i>p-value</i>  |                  | 0.143                    | 0.150              | 0.006                    | 0.061              |       |                |        |
| Drip losses (%) | 5 months         | 13.82 <sup>a</sup>       | 11.38 <sup>a</sup> | 12.15 <sup>a</sup>       | 11.77 <sup>a</sup> | 0.542 | 0.557          | 0.205  |
|                 | 6 months         | 7.86 <sup>b</sup>        | 7.52 <sup>b</sup>  | 7.05 <sup>b</sup>        | 7.01 <sup>b</sup>  | 0.218 | 0.146          | 0.666  |
|                 | 7 months         | 6.48 <sup>b</sup>        | 4.08 <sup>c</sup>  | 6.78 <sup>b</sup>        | 4.32 <sup>c</sup>  | 0.306 | 0.543          | <0.001 |
|                 | 8 months         | 4.31 <sup>c</sup>        | 3.26 <sup>c</sup>  | 3.85 <sup>c</sup>        | 3.19 <sup>c</sup>  | 0.132 | 0.224          | 0.001  |
| <i>p-value</i>  |                  | <0.001                   | <0.001             | <0.001                   | <0.001             |       |                |        |

Abbreviations: SEM: standard error of the mean; values with different superscript letters (a, b, c) within the same column per fixed effect (age of slaughter) differ significantly ( $p < 0.05$ ). The effect of interaction between “Breed” and “Gender” was not significant; therefore, significance is only presented for main effects.

**Table S3.** Chemical composition (g/100 g FM) and hydroxyproline content (mg/g dry weight) of breast meat at different slaughter ages (n = 8).

| Items           | Age at slaughter | <i>Bionda Piemontese</i> |                     | <i>Bianca di Saluzzo</i> |                    | SEM   | <i>p-value</i> |        |
|-----------------|------------------|--------------------------|---------------------|--------------------------|--------------------|-------|----------------|--------|
|                 |                  | Male                     | Female              | Male                     | Female             |       | Breed          | Gender |
| Moisture        | 5 months         | 75.13 <sup>a</sup>       | 73.22 <sup>ab</sup> | 74.98 <sup>a</sup>       | 73.38              | 0.227 | 0.984          | <0.001 |
|                 | 6 months         | 74.63 <sup>ab</sup>      | 74.08 <sup>a</sup>  | 74.37 <sup>ab</sup>      | 73.82              | 0.119 | 0.254          | 0.020  |
|                 | 7 months         | 73.90 <sup>bc</sup>      | 72.53 <sup>c</sup>  | 73.55 <sup>b</sup>       | 73.06              | 0.162 | 0.740          | 0.002  |
|                 | 8 months         | 73.75 <sup>c</sup>       | 73.47 <sup>ab</sup> | 73.79 <sup>b</sup>       | 73.42              | 0.119 | 0.998          | 0.192  |
| <i>p-value</i>  |                  | 0.03                     | 0.03                | 0.011                    | 0.294              |       |                |        |
| Crude protein   | 5 months         | 26.13                    | 24.30               | 26.66 <sup>a</sup>       | 25.20              | 0.325 | 0.235          | 0.010  |
|                 | 6 months         | 24.20                    | 24.62               | 24.36 <sup>c</sup>       | 24.52              | 0.115 | 0.901          | 0.223  |
|                 | 7 months         | 24.73                    | 25.18               | 25.96 <sup>ab</sup>      | 24.93              | 0.220 | 0.264          | 0.514  |
|                 | 8 months         | 24.95                    | 24.82               | 25.31 <sup>ab</sup>      | 24.72              | 0.136 | 0.642          | 0.197  |
| <i>p-value</i>  |                  | 0.071                    | 0.489               | 0.006                    | 0.330              |       |                |        |
| Crude fat       | 5 months         | 0.23                     | 0.75 <sup>b</sup>   | 0.11 <sup>b</sup>        | 0.55 <sup>b</sup>  | 0.069 | 0.147          | <0.001 |
|                 | 6 months         | 0.31                     | 0.61 <sup>b</sup>   | 0.29 <sup>a</sup>        | 0.88 <sup>ab</sup> | 0.087 | 0.429          | 0.009  |
|                 | 7 months         | 0.33                     | 1.72 <sup>a</sup>   | 0.30 <sup>a</sup>        | 1.22 <sup>a</sup>  | 0.138 | 0.162          | <0.001 |
|                 | 8 months         | 0.37                     | 0.50 <sup>b</sup>   | 0.21 <sup>ab</sup>       | 0.35 <sup>b</sup>  | 0.038 | 0.033          | 0.056  |
| <i>p-value</i>  |                  | 0.329                    | <0.001              | 0.046                    | 0.014              |       |                |        |
| Ash             | 5 months         | 1.14                     | 1.22                | 1.13 <sup>b</sup>        | 1.22               | 0.013 | 0.819          | 0.004  |
|                 | 6 months         | 1.17                     | 1.20                | 1.15 <sup>b</sup>        | 1.15               | 0.008 | 0.048          | 0.301  |
|                 | 7 months         | 1.19                     | 1.18                | 1.21 <sup>a</sup>        | 1.16               | 0.010 | 1.000          | 0.260  |
|                 | 8 months         | 1.21                     | 1.20                | 1.18 <sup>ab</sup>       | 1.21               | 0.009 | 0.767          | 0.576  |
| <i>p-value</i>  |                  | 0.250                    | 0.769               | 0.036                    | 0.065              |       |                |        |
| Hydroxy proline | 5 months         | 1.49                     | 2.33 <sup>ab</sup>  | 1.12 <sup>c</sup>        | 2.48               | 0.179 | 0.722          | 0.001  |
|                 | 6 months         | 1.95                     | 1.84 <sup>b</sup>   | 1.98 <sup>bc</sup>       | 2.13               | 0.102 | 0.454          | 0.918  |
|                 | 7 months         | 2.75                     | 3.02 <sup>a</sup>   | 3.06 <sup>a</sup>        | 3.04               | 0.223 | 0.500          | 0.956  |
|                 | 8 months         | 2.99                     | 3.00 <sup>a</sup>   | 2.89 <sup>ab</sup>       | 3.16               | 0.169 | 0.903          | 0.668  |
| <i>p-value</i>  |                  | 0.075                    | 0.013               | <0.001                   | 0.107              |       |                |        |

Abbreviations: FM: fresh matter; SEM: standard error of the mean; values with different superscript letters (a, b, c) within the same column per fixed effect (age of slaughter) differ significantly ( $p < 0.05$ ). The effect of interaction between “Breed” and “Gender” was not significant; therefore, significance is only presented for main effects.

**Table S4.** Chemical composition (g/100 g FM) of thigh meat at different slaughter ages (n = 8).

| Items             | Age at slaughter | <i>Bionda Piemontese</i> |                    | <i>Bianca di Saluzzo</i> |                    | SEM   | <i>p-value</i> |        |
|-------------------|------------------|--------------------------|--------------------|--------------------------|--------------------|-------|----------------|--------|
|                   |                  | Male                     | Female             | Male                     | Female             |       | Breed          | Gender |
| Moisture          | 5 months         | 76.19 <sup>a</sup>       | 82.21 <sup>a</sup> | 76.42 <sup>a</sup>       | 81.47 <sup>a</sup> | 0.740 | 0.827          | <0.001 |
|                   | 6 months         | 74.96 <sup>b</sup>       | 73.39 <sup>b</sup> | 75.04 <sup>b</sup>       | 73.12 <sup>b</sup> | 0.211 | 0.752          | <0.001 |
|                   | 7 months         | 75.26 <sup>b</sup>       | 71.54 <sup>b</sup> | 75.08 <sup>b</sup>       | 71.84 <sup>b</sup> | 0.346 | 0.854          | <0.001 |
|                   | 8 months         | 74.76 <sup>b</sup>       | 72.57 <sup>b</sup> | 75.12 <sup>b</sup>       | 72.14 <sup>b</sup> | 0.329 | 0.940          | <0.001 |
| <i>p-value</i>    |                  | 0.004                    | <0.001             | 0.003                    | <0.001             |       |                |        |
| Crude protein     | 5 months         | 26.85                    | 26.88              | 27.13                    | 27.89              | 0.303 | 0.308          | 0.526  |
|                   | 6 months         | 27.11                    | 26.35              | 27.38                    | 26.19              | 0.186 | 0.873          | 0.008  |
|                   | 7 months         | 27.58                    | 28.15              | 27.81                    | 29.33              | 0.298 | 0.416          | 0.232  |
|                   | 8 months         | 27.36                    | 27.98              | 27.68                    | 28.72              | 0.417 | 0.540          | 0.340  |
| <i>p-value</i>    |                  | 0.682                    | 0.359              | 0.747                    | 0.018              |       |                |        |
| Crude fat extract | 5 months         | 1.00 <sup>b</sup>        | 2.30 <sup>c</sup>  | 0.96 <sup>c</sup>        | 2.28 <sup>c</sup>  | 0.136 | 0.859          | <0.001 |
|                   | 6 months         | 2.15 <sup>a</sup>        | 4.33 <sup>b</sup>  | 2.55 <sup>a</sup>        | 4.91 <sup>b</sup>  | 0.274 | 0.194          | <0.001 |
|                   | 7 months         | 1.65 <sup>a</sup>        | 6.92 <sup>a</sup>  | 1.79 <sup>b</sup>        | 6.14 <sup>a</sup>  | 0.460 | 0.325          | <0.001 |
|                   | 8 months         | 2.03 <sup>a</sup>        | 4.28 <sup>b</sup>  | 1.84 <sup>b</sup>        | 4.01 <sup>b</sup>  | 0.220 | 0.246          | <0.001 |
| <i>p-value</i>    |                  | <0.001                   | <0.001             | <0.001                   | <0.001             |       |                |        |
| Ash               | 5 months         | 1.08                     | 0.75 <sup>b</sup>  | 1.08                     | 0.77 <sup>c</sup>  | 0.038 | 0.838          | <0.001 |
|                   | 6 months         | 1.13                     | 1.12 <sup>a</sup>  | 1.12                     | 1.08 <sup>ab</sup> | 0.009 | 0.227          | 0.121  |
|                   | 7 months         | 1.10                     | 1.02 <sup>a</sup>  | 1.07                     | 1.01 <sup>b</sup>  | 0.008 | 0.035          | <0.001 |
|                   | 8 months         | 1.13                     | 1.13 <sup>a</sup>  | 1.11                     | 1.14 <sup>a</sup>  | 0.011 | 0.937          | 0.400  |
| <i>p-value</i>    |                  | 0.060                    | <0.001             | 0.066                    | <0.001             |       |                |        |

Abbreviations: FM: fresh matter; SEM: standard error of the mean; values with different superscript letters (a, b, c) within the same column per fixed effect (age of slaughter) differ significantly ( $p < 0.05$ ). The effect of interaction between “Breed” and “Gender” was not significant; therefore, significance is only presented for main effects.

**Table S5.** Saturated fatty acid profile of breast meat at different slaughter ages (g/100g of total fatty acids) (n = 8).

| Items          | Age at slaughter | <i>Bionda Piemontese</i> |                     | <i>Bianca di Saluzzo</i> |                    | SEM   | <i>p-value</i> |        |
|----------------|------------------|--------------------------|---------------------|--------------------------|--------------------|-------|----------------|--------|
|                |                  | Male                     | Female              | Male                     | Female             |       | Breed          | Gender |
| C14            | 5 months         | 0.36                     | 0.60 <sup>b</sup>   | 0.13                     | 0.41 <sup>b</sup>  | 0.049 | 0.014          | 0.003  |
|                | 6 months         | 0.39                     | 0.51 <sup>b</sup>   | 0.18                     | 0.48 <sup>b</sup>  | 0.034 | 0.032          | 0.001  |
|                | 7 months         | 0.41                     | 0.86 <sup>a</sup>   | 0.32                     | 0.66 <sup>a</sup>  | 0.049 | 0.042          | <0.001 |
|                | 8 months         | 0.51                     | 0.59 <sup>b</sup>   | 1.02                     | 0.50 <sup>b</sup>  | 0.191 | 0.549          | 0.571  |
| <i>p-value</i> |                  | 0.531                    | 0.001               | 0.362                    | 0.023              |       |                |        |
| C16            | 5 months         | 24.35 <sup>b</sup>       | 28.43 <sup>bc</sup> | 24.72                    | 26.36              | 0.580 | 0.427          | 0.427  |
|                | 6 months         | 27.74 <sup>a</sup>       | 26.74 <sup>c</sup>  | 27.09                    | 27.60              | 0.421 | 0.905          | 0.781  |
|                | 7 months         | 30.05 <sup>a</sup>       | 33.27 <sup>a</sup>  | 27.07                    | 29.10              | 0.656 | 0.003          | 0.023  |
|                | 8 months         | 30.41 <sup>a</sup>       | 29.20 <sup>b</sup>  | 28.88                    | 27.97              | 0.417 | 0.101          | 0.204  |
| <i>p-value</i> |                  | 0.001                    | <0.001              | 0.171                    | 0.103              |       |                |        |
| C17            | 5 months         | 0.24                     | 0.32 <sup>ab</sup>  | 0.16                     | 0.26               | 0.024 | 0.133          | 0.072  |
|                | 6 months         | 0.25                     | 0.20 <sup>c</sup>   | 0.16                     | 0.30               | 0.022 | 0.942          | 0.269  |
|                | 7 months         | 0.48                     | 0.41 <sup>a</sup>   | 0.21                     | 0.40               | 0.039 | 0.062          | 0.375  |
|                | 8 months         | 0.37                     | 0.31 <sup>b</sup>   | 0.43                     | 0.29               | 0.058 | 0.878          | 0.394  |
| <i>p-value</i> |                  | 0.123                    | 0.003               | 0.352                    | 0.106              |       |                |        |
| C18            | 5 months         | 12.79 <sup>b</sup>       | 12.77 <sup>a</sup>  | 14.06 <sup>b</sup>       | 12.73 <sup>a</sup> | 0.249 | 0.207          | 0.168  |
|                | 6 months         | 13.74 <sup>b</sup>       | 11.26 <sup>b</sup>  | 13.60 <sup>b</sup>       | 12.58 <sup>a</sup> | 0.250 | 0.119          | <0.001 |
|                | 7 months         | 15.43 <sup>a</sup>       | 11.51 <sup>b</sup>  | 14.52 <sup>b</sup>       | 10.84 <sup>b</sup> | 0.393 | 0.046          | <0.001 |
|                | 8 months         | 14.96 <sup>a</sup>       | 10.91 <sup>b</sup>  | 16.72 <sup>a</sup>       | 11.98 <sup>a</sup> | 0.445 | <0.001         | <0.001 |
| <i>p-value</i> |                  | <0.001                   | 0.011               | <0.001                   | 0.006              |       |                |        |
| C24            | 5 months         | 1.56 <sup>a</sup>        | 1.06                | 2.04                     | 1.58 <sup>a</sup>  | 0.097 | 0.004          | 0.005  |
|                | 6 months         | 1.20 <sup>ab</sup>       | 1.27                | 1.52                     | 0.90 <sup>b</sup>  | 0.127 | 0.924          | 0.283  |
|                | 7 months         | 0.87 <sup>bc</sup>       | 0.66                | 1.12                     | 0.35 <sup>c</sup>  | 0.103 | 0.894          | 0.015  |
|                | 8 months         | 0.67 <sup>c</sup>        | 1.15                | 1.15                     | 0.78 <sup>b</sup>  | 0.087 | 0.725          | 0.736  |
| <i>p-value</i> |                  | 0.002                    | 0.232               | 0.065                    | <0.001             |       |                |        |
| ΣSFA           | 5 months         | 39.30 <sup>c</sup>       | 43.18 <sup>b</sup>  | 41.11 <sup>b</sup>       | 41.33              | 0.646 | 0.987          | 0.114  |
|                | 6 months         | 43.33 <sup>b</sup>       | 39.98 <sup>c</sup>  | 42.55 <sup>b</sup>       | 41.87              | 0.487 | 0.547          | 0.035  |
|                | 7 months         | 47.24 <sup>a</sup>       | 46.71 <sup>a</sup>  | 43.25 <sup>b</sup>       | 41.36              | 0.573 | 0.001          | 0.353  |
|                | 8 months         | 46.93 <sup>a</sup>       | 42.16 <sup>bc</sup> | 48.21 <sup>a</sup>       | 41.53              | 0.677 | 0.720          | <0.001 |
| <i>p-value</i> |                  | <0.001                   | <0.001              | 0.010                    | 0.973              |       |                |        |

Abbreviations: SFA: saturated fatty acids; SEM: standard error of the mean; values with different superscript letters (a, b, c) within the same column per fixed effect (age of slaughter) differ significantly ( $p < 0.05$ ). The effect of interaction between “Breed” and “Gender” was not significant; therefore, significance is only presented for main effects.

**Table S6.** Monounsaturated fatty acid profile of breast meat at different slaughter ages (g/100g of total detected fatty acids) (n = 8).

| Items          | Age at slaughter | <i>Bionda Piemontese</i> |                    | <i>Bianca di Saluzzo</i> |                     | SEM   | <i>p-value</i> |        |
|----------------|------------------|--------------------------|--------------------|--------------------------|---------------------|-------|----------------|--------|
|                |                  | Male                     | Female             | Male                     | Female              |       | Breed          | Gender |
| C16 :1n7       | 5 months         | 1.23                     | 1.56 <sup>b</sup>  | 0.69                     | 1.51 <sup>b</sup>   | 0.132 | 0.244          | 0.027  |
|                | 6 months         | 1.07                     | 1.95 <sup>b</sup>  | 1.23                     | 1.80 <sup>b</sup>   | 0.134 | 0.986          | 0.006  |
|                | 7 months         | 1.17                     | 3.71 <sup>a</sup>  | 1.10                     | 3.24 <sup>a</sup>   | 0.239 | 0.260          | <0.001 |
|                | 8 months         | 1.34                     | 2.16 <sup>b</sup>  | 0.56                     | 1.81 <sup>b</sup>   | 0.147 | 0.012          | <0.001 |
| <i>p-value</i> |                  | 0.846                    | <0.001             | 0.056                    | <0.001              |       |                |        |
| C18 :1c9       | 5 months         | 25.46 <sup>b</sup>       | 31.20 <sup>c</sup> | 23.34 <sup>b</sup>       | 29.87 <sup>c</sup>  | 0.804 | 0.157          | <0.001 |
|                | 6 months         | 28.40 <sup>ab</sup>      | 31.39 <sup>c</sup> | 30.07 <sup>a</sup>       | 32.39 <sup>bc</sup> | 0.706 | 0.340          | 0.063  |
|                | 7 months         | 29.43 <sup>a</sup>       | 40.48 <sup>a</sup> | 30.82 <sup>a</sup>       | 40.78 <sup>a</sup>  | 1.097 | 0.474          | <0.001 |
|                | 8 months         | 30.79 <sup>a</sup>       | 36.95 <sup>b</sup> | 28.49 <sup>a</sup>       | 34.20 <sup>b</sup>  | 0.796 | 0.036          | <0.001 |
| <i>p-value</i> |                  | 0.033                    | <0.001             | 0.001                    | <0.001              |       |                |        |
| C20: 1         | 5 months         | 0.20                     | 0.18               | 0.06                     | 0.28                | 0.030 | 0.756          | 0.071  |
|                | 6 months         | 0.38                     | 0.15               | 0.09                     | 0.34                | 0.037 | 0.392          | 0.913  |
|                | 7 months         | 0.23                     | 0.26               | 0.26                     | 0.29                | 0.034 | 0.681          | 0.681  |
|                | 8 months         | 0.27                     | 0.21               | 0.20                     | 0.19                | 0.032 | 0.537          | 0.574  |
| <i>p-value</i> |                  | 0.224                    | 0.605              | 0.229                    | 0.403               |       |                |        |
| C24:1          | 5 months         | 0.58                     | 0.64 <sup>a</sup>  | 0.98                     | 0.53 <sup>a</sup>   | 0.072 | 0.289          | 0.159  |
|                | 6 months         | 0.33                     | 0.70 <sup>a</sup>  | 0.62                     | 0.59 <sup>a</sup>   | 0.065 | 0.498          | 0.179  |
|                | 7 months         | 0.56                     | 0.15 <sup>b</sup>  | 0.42                     | 0.21 <sup>b</sup>   | 0.088 | 0.808          | 0.085  |
|                | 8 months         | 0.21                     | 0.51 <sup>a</sup>  | 0.72                     | 0.68 <sup>a</sup>   | 0.065 | 0.006          | 0.260  |
| <i>p-value</i> |                  | 0.384                    | 0.013              | 0.090                    | 0.006               |       |                |        |
| ΣMUFA          | 5 months         | 27.46                    | 33.58 <sup>c</sup> | 25.08 <sup>b</sup>       | 32.20 <sup>c</sup>  | 0.871 | 0.155          | <0.001 |
|                | 6 months         | 30.18                    | 34.19 <sup>c</sup> | 32.01 <sup>a</sup>       | 35.12 <sup>bc</sup> | 0.812 | 0.381          | 0.029  |
|                | 7 months         | 31.38                    | 44.60 <sup>a</sup> | 32.60 <sup>a</sup>       | 44.52 <sup>a</sup>  | 0.774 | 0.674          | <0.001 |
|                | 8 months         | 32.62                    | 39.83 <sup>b</sup> | 29.97 <sup>a</sup>       | 36.89 <sup>b</sup>  | 0.902 | 0.033          | <0.001 |
| <i>p-value</i> |                  | 0.087                    | <0.001             | 0.003                    | <0.001              |       |                |        |

Abbreviations: MUFA: monounsaturated fatty acids; SEM: standard error of the mean; values with different superscript letters (a, b, c) within the same column per fixed effect (age of slaughter) differ significantly ( $p < 0.05$ ). The effect of interaction between “Breed” and “Gender” was not significant; therefore, significance is only presented for main effects.

**Table S7.** Polyunsaturated fatty acid profile of breast meat at different slaughter ages (g/100g of total detected fatty acids) (n = 8).

| Items          | Age at slaughter | <i>Bionda Piemontese</i> |                    | <i>Bianca di Saluzzo</i> |                     | SEM   | <i>p-value</i> |        |
|----------------|------------------|--------------------------|--------------------|--------------------------|---------------------|-------|----------------|--------|
|                |                  | Male                     | Female             | Male                     | Female              |       | Breed          | Gender |
| C18 :2n6       | 5 months         | 15.18                    | 13.07 <sup>a</sup> | 15.00                    | 13.47               | 0.476 | 0.908          | 0.063  |
|                | 6 months         | 12.97                    | 13.95 <sup>a</sup> | 11.47                    | 11.75               | 0.369 | 0.011          | 0.359  |
|                | 7 months         | 11.71                    | 4.71 <sup>b</sup>  | 12.69                    | 9.49                | 0.762 | 0.015          | <0.001 |
|                | 8 months         | 13.67                    | 11.90 <sup>a</sup> | 13.37                    | 11.22               | 0.567 | 0.666          | 0.094  |
| <i>p-value</i> |                  | 0.256                    | <0.001             | 0.056                    | 0.060               |       |                |        |
| C20 :2n6       | 5 months         | 0.32                     | 0.16 <sup>ab</sup> | 0.19                     | 0.24                | 0.035 | 0.700          | 0.438  |
|                | 6 months         | 0.25                     | 0.11 <sup>b</sup>  | 0.37                     | 0.13                | 0.369 | 0.211          | 0.002  |
|                | 7 months         | 0.22                     | 0.03 <sup>b</sup>  | 0.21                     | 0.12                | 0.030 | 0.458          | 0.012  |
|                | 8 months         | 0.23                     | 0.28 <sup>a</sup>  | 0.39                     | 0.18                | 0.037 | 0.735          | 0.276  |
| <i>p-value</i> |                  | 0.631                    | 0.009              | 0.224                    | 0.376               |       |                |        |
| C20: 4n6       | 5 months         | 10.19 <sup>a</sup>       | 6.86 <sup>a</sup>  | 12.67 <sup>a</sup>       | 8.06 <sup>a</sup>   | 0.578 | 0.047          | <0.001 |
|                | 6 months         | 7.72 <sup>a</sup>        | 7.35 <sup>a</sup>  | 8.32 <sup>b</sup>        | 6.24 <sup>ab</sup>  | 0.501 | 0.803          | 0.243  |
|                | 7 months         | 4.69 <sup>b</sup>        | 0.65 <sup>b</sup>  | 5.74 <sup>b</sup>        | 1.84 <sup>c</sup>   | 0.610 | 0.282          | 0.001  |
|                | 8 months         | 2.81 <sup>b</sup>        | 1.47 <sup>b</sup>  | 1.48 <sup>c</sup>        | 4.63 <sup>b</sup>   | 0.483 | 0.313          | 0.320  |
| <i>p-value</i> |                  | <0.001                   | <0.001             | <0.001                   | <0.001              |       |                |        |
| Σn6 PUFA       | 5 months         | 25.69 <sup>a</sup>       | 20.09 <sup>a</sup> | 27.85 <sup>a</sup>       | 21.77 <sup>a</sup>  | 0.909 | 0.217          | 0.004  |
|                | 6 months         | 20.94 <sup>b</sup>       | 21.43 <sup>a</sup> | 20.15 <sup>b</sup>       | 18.25 <sup>ab</sup> | 0.714 | 0.177          | 0.625  |
|                | 7 months         | 16.62 <sup>b</sup>       | 5.41 <sup>c</sup>  | 18.64 <sup>b</sup>       | 11.48 <sup>c</sup>  | 1.240 | 0.028          | <0.001 |
|                | 8 months         | 16.72 <sup>b</sup>       | 13.65 <sup>b</sup> | 15.24 <sup>b</sup>       | 16.03 <sup>bc</sup> | 0.822 | 0.792          | 0.503  |
| <i>p-value</i> |                  | 0.001                    | <0.001             | <0.001                   | 0.001               |       |                |        |
| C18 :3n3       | 5 months         | 0.06                     | 0.11 <sup>b</sup>  | 0.00 <sup>b</sup>        | 0.15                | 0.018 | 0.759          | 0.004  |
|                | 6 months         | 0.06                     | 0.11 <sup>b</sup>  | 0.03 <sup>b</sup>        | 0.13                | 0.021 | 0.840          | 0.109  |
|                | 7 months         | 0.09                     | 0.10 <sup>b</sup>  | 0.14 <sup>a</sup>        | 0.19                | 0.020 | 0.109          | 0.506  |
|                | 8 months         | 0.12                     | 0.54 <sup>a</sup>  | 0.02 <sup>b</sup>        | 0.20                | 0.056 | 0.024          | 0.003  |
| <i>p-value</i> |                  | 0.597                    | 0.001              | 0.002                    | 0.742               |       |                |        |
| C20 :5n3       | 5 months         | 1.21 <sup>a</sup>        | 0.36               | 0.71                     | 0.40                | 0.201 | 0.571          | 0.159  |
|                | 6 months         | 0.22 <sup>b</sup>        | 0.44               | 0.61                     | 0.62                | 0.158 | 0.389          | 0.735  |
|                | 7 months         | 0.06 <sup>b</sup>        | 0.01               | 0.50                     | 0.01                | 0.061 | 0.039          | 0.014  |
|                | 8 months         | 0.31 <sup>b</sup>        | 0.12               | 1.00                     | 0.30                | 0.166 | 0.193          | 0.179  |
| <i>p-value</i> |                  | 0.047                    | 0.542              | 0.853                    | 0.406               |       |                |        |
| C22 :5n3       | 5 months         | 1.08 <sup>a</sup>        | 0.65 <sup>a</sup>  | 1.25                     | 0.70 <sup>a</sup>   | 0.092 | 0.513          | 0.007  |
|                | 6 months         | 0.60 <sup>b</sup>        | 0.52 <sup>a</sup>  | 0.85                     | 0.54 <sup>a</sup>   | 0.061 | 0.269          | 0.114  |
|                | 7 months         | 0.40 <sup>b</sup>        | 0.05 <sup>b</sup>  | 0.77                     | 0.15 <sup>b</sup>   | 0.087 | 0.124          | 0.003  |
|                | 8 months         | 0.36 <sup>b</sup>        | 0.27 <sup>b</sup>  | 0.84                     | 0.49 <sup>a</sup>   | 0.166 | 0.004          | 0.060  |
| <i>p-value</i> |                  | 0.004                    | <0.001             | 0.353                    | 0.005               |       |                |        |
| C22 :6n3       | 5 months         | 0.95 <sup>a</sup>        | 0.87 <sup>ab</sup> | 1.14                     | 0.66 <sup>ab</sup>  | 0.086 | 0.956          | 0.104  |
|                | 6 months         | 0.56 <sup>b</sup>        | 1.15 <sup>a</sup>  | 0.72                     | 0.73 <sup>ab</sup>  | 0.076 | 0.347          | 0.036  |
|                | 7 months         | 0.38 <sup>b</sup>        | 0.08 <sup>c</sup>  | 0.61                     | 0.18 <sup>b</sup>   | 0.071 | 0.199          | 0.007  |



|                       |          |                    |                    |                    |                     |       |       |        |
|-----------------------|----------|--------------------|--------------------|--------------------|---------------------|-------|-------|--------|
|                       | 8 months | 0.31 <sup>b</sup>  | 0.49 <sup>bc</sup> | 0.80               | 1.13 <sup>a</sup>   | 0.127 | 0.027 | 0.296  |
| <b><i>p</i>-value</b> |          | 0.008              | <0.001             | 0.279              | 0.041               |       |       |        |
| Σn3 PUFA              | 5 months | 3.31 <sup>a</sup>  | 1.98 <sup>a</sup>  | 3.11               | 1.92 <sup>a</sup>   | 0.280 | 0.805 | 0.028  |
|                       | 6 months | 1.45 <sup>b</sup>  | 2.22 <sup>a</sup>  | 2.21               | 2.03 <sup>a</sup>   | 0.209 | 0.511 | 0.493  |
|                       | 7 months | 0.93 <sup>b</sup>  | 0.24 <sup>b</sup>  | 2.03               | 0.54 <sup>b</sup>   | 0.168 | 0.008 | <0.001 |
|                       | 8 months | 1.10 <sup>b</sup>  | 1.42 <sup>a</sup>  | 2.66               | 2.11 <sup>a</sup>   | 0.283 | 0.050 | 0.837  |
| <b><i>p</i>-value</b> |          | 0.002              | <0.001             | 0.641              | 0.021               |       |       |        |
| ΣPUFA                 | 5 months | 29.01 <sup>a</sup> | 22.08 <sup>a</sup> | 30.96 <sup>a</sup> | 23.69 <sup>a</sup>  | 1.041 | 0.303 | 0.002  |
|                       | 6 months | 22.39 <sup>b</sup> | 23.63 <sup>a</sup> | 22.36 <sup>b</sup> | 20.15 <sup>ab</sup> | 0.829 | 0.305 | 0.774  |
|                       | 7 months | 17.56 <sup>b</sup> | 5.63 <sup>c</sup>  | 20.67 <sup>b</sup> | 11.98 <sup>c</sup>  | 1.370 | 0.019 | <0.001 |
|                       | 8 months | 17.82 <sup>b</sup> | 15.08 <sup>b</sup> | 17.90 <sup>b</sup> | 18.14 <sup>b</sup>  | 0.877 | 0.386 | 0.487  |
| <b><i>p</i>-value</b> |          | <0.001             | <0.001             | 0.001              | <0.001              |       |       |        |

Abbreviations: PUFA: polyunsaturated fatty acids; SEM: standard error of the mean; values with different superscript letters (a, b, c) within the same column per fixed effect (age of slaughter) differ significantly ( $p < 0.05$ ). The effect of interaction between “Breed” and “Gender” was not significant; therefore, significance is only presented for main effects.

**Table S8.** Saturated fatty acid profile of thigh meat at different slaughter ages (g/100g of total fatty acids) (n = 8).

| Items          | Age at slaughter | <i>Bionda Piemontese</i> |                    | <i>Bianca di Saluzzo</i> |                     | SEM   | <i>p-value</i> |        |
|----------------|------------------|--------------------------|--------------------|--------------------------|---------------------|-------|----------------|--------|
|                |                  | Male                     | Female             | Male                     | Female              |       | Breed          | Gender |
| C14            | 5 months         | 0.97 <sup>a</sup>        | 1.26               | 0.86 <sup>a</sup>        | 1.01                | 0.049 | 0.038          | 0.015  |
|                | 6 months         | 0.97 <sup>a</sup>        | 1.09               | 0.88 <sup>a</sup>        | 0.99                | 0.022 | 0.013          | 0.005  |
|                | 7 months         | 0.84 <sup>ab</sup>       | 1.08               | 0.71 <sup>b</sup>        | 1.05                | 0.033 | 0.071          | <0.001 |
|                | 8 months         | 0.80 <sup>b</sup>        | 1.08               | 0.62 <sup>b</sup>        | 0.96                | 0.035 | <0.001         | <0.001 |
| <i>p-value</i> |                  | 0.043                    | 0.250              | <0.001                   | 0.470               |       |                |        |
| C16            | 5 months         | 32.53                    | 36.68              | 30.53 <sup>ab</sup>      | 32.90 <sup>b</sup>  | 0.524 | <0.001         | <0.001 |
|                | 6 months         | 33.27                    | 35.58              | 32.16 <sup>a</sup>       | 34.84 <sup>ab</sup> | 0.411 | 0.199          | 0.001  |
|                | 7 months         | 32.96                    | 36.27              | 31.42 <sup>a</sup>       | 36.42 <sup>a</sup>  | 0.486 | 0.277          | <0.001 |
|                | 8 months         | 31.62                    | 36.42              | 29.05 <sup>b</sup>       | 34.39 <sup>ab</sup> | 0.582 | 0.001          | <0.001 |
| <i>p-value</i> |                  | 0.494                    | 0.542              | 0.002                    | 0.023               |       |                |        |
| C17            | 5 months         | 0.45                     | 0.38               | 0.51                     | 0.47                | 0.018 | 0.024          | 0.090  |
|                | 6 months         | 0.43                     | 0.39               | 0.44                     | 0.45                | 0.025 | 0.509          | 0.813  |
|                | 7 months         | 0.47                     | 0.45               | 0.44                     | 0.39                | 0.011 | 0.029          | 0.057  |
|                | 8 months         | 0.43                     | 0.49               | 0.43                     | 0.32                | 0.021 | 0.031          | 0.469  |
| <i>p-value</i> |                  | 0.822                    | 0.139              | 0.263                    | 0.096               |       |                |        |
| C18            | 5 months         | 18.83 <sup>c</sup>       | 13.12              | 21.33                    | 14.64 <sup>a</sup>  | 0.696 | 0.017          | <0.001 |
|                | 6 months         | 19.20 <sup>bc</sup>      | 12.44              | 18.09                    | 13.45 <sup>ab</sup> | 0.625 | 0.946          | <0.001 |
|                | 7 months         | 21.35 <sup>a</sup>       | 12.36              | 19.45                    | 12.00 <sup>b</sup>  | 0.839 | 0.168          | <0.001 |
|                | 8 months         | 20.92 <sup>ab</sup>      | 12.50              | 21.05                    | 12.86 <sup>ab</sup> | 0.807 | 0.709          | <0.001 |
| <i>p-value</i> |                  | 0.029                    | 0.685              | 0.132                    | 0.045               |       |                |        |
| C24            | 5 months         | 0.67                     | 0.57 <sup>c</sup>  | 0.50                     | 0.50 <sup>b</sup>   | 0.045 | 0.205          | 0.608  |
|                | 6 months         | 0.31                     | 0.96 <sup>bc</sup> | 0.76                     | 0.88 <sup>ab</sup>  | 0.076 | 0.156          | 0.006  |
|                | 7 months         | 0.53                     | 1.25 <sup>ab</sup> | 0.66                     | 1.01 <sup>a</sup>   | 0.090 | 0.734          | 0.002  |
|                | 8 months         | 0.72                     | 1.50 <sup>a</sup>  | 0.62                     | 1.14 <sup>a</sup>   | 0.089 | 0.088          | <0.001 |
| <i>p-value</i> |                  | 0.052                    | 0.001              | 0.378                    | 0.022               |       |                |        |
| ΣSFA           | 5 months         | 53.45 <sup>b</sup>       | 52.01              | 53.73                    | 49.52               | 0.537 | 0.248          | 0.005  |
|                | 6 months         | 54.18 <sup>ab</sup>      | 50.47              | 52.34                    | 50.61               | 0.536 | 0.388          | 0.009  |
|                | 7 months         | 56.15 <sup>a</sup>       | 51.40              | 52.69                    | 50.87               | 0.573 | 0.039          | 0.001  |
|                | 8 months         | 54.49 <sup>ab</sup>      | 51.99              | 51.77                    | 49.67               | 0.562 | 0.017          | 0.028  |
| <i>p-value</i> |                  | 0.148                    | 0.324              | 0.657                    | 0.798               |       |                |        |

Abbreviations: SFA: saturated fatty acids; SEM: standard error of the mean; values with different superscript letters (a, b, c) within the same column per fixed effect (age of slaughter) differ significantly ( $p < 0.05$ ). The effect of interaction between “Breed” and “Gender” was not significant; therefore, significance is only presented for main effects.

**Table S9.** Monounsaturated fatty acid profile of thigh meat at different slaughter ages (g/100g of total fatty acids) (n = 8).

| Items           | Age at slaughter | <i>Bionda Piemontese</i> |        | <i>Bianca di Saluzzo</i> |                    | SEM   | <i>p</i> -value |        |
|-----------------|------------------|--------------------------|--------|--------------------------|--------------------|-------|-----------------|--------|
|                 |                  | Male                     | Female | Male                     | Female             |       | Breed           | Gender |
| C16 :1n7        | 5 months         | 3.07 <sup>a</sup>        | 4.67   | 2.53 <sup>ab</sup>       | 3.88               | 0.196 | 0.022           | <0.001 |
|                 | 6 months         | 2.95 <sup>a</sup>        | 4.46   | 3.27 <sup>a</sup>        | 4.24               | 0.174 | 0.865           | <0.001 |
|                 | 7 months         | 2.20 <sup>b</sup>        | 4.24   | 2.53 <sup>ab</sup>       | 4.63               | 0.223 | 0.159           | <0.001 |
|                 | 8 months         | 2.47 <sup>ab</sup>       | 4.61   | 1.97 <sup>b</sup>        | 3.98               | 0.225 | 0.026           | <0.001 |
| <i>p</i> -value |                  | 0.019                    | 0.762  | 0.026                    | 0.142              |       |                 |        |
| C18 :1c9        | 5 months         | 34.84                    | 36.63  | 32.62 <sup>b</sup>       | 37.73              | 0.509 | 0.482           | <0.001 |
|                 | 6 months         | 36.44                    | 38.98  | 37.41 <sup>a</sup>       | 40.04              | 0.511 | 0.288           | 0.011  |
|                 | 7 months         | 33.68                    | 39.25  | 36.96 <sup>a</sup>       | 40.25              | 0.602 | 0.016           | <0.001 |
|                 | 8 months         | 34.97                    | 37.88  | 34.57 <sup>ab</sup>      | 40.18              | 0.575 | 0.269           | <0.001 |
| <i>p</i> -value |                  | 0.102                    | 0.087  | 0.008                    | 0.137              |       |                 |        |
| C20: 1          | 5 months         | 0.40                     | 0.39   | 0.53                     | 0.55 <sup>a</sup>  | 0.024 | 0.002           | 0.849  |
|                 | 6 months         | 0.46                     | 0.38   | 0.55                     | 0.41 <sup>b</sup>  | 0.023 | 0.153           | 0.011  |
|                 | 7 months         | 0.37                     | 0.36   | 0.42                     | 0.34 <sup>bc</sup> | 0.034 | 0.840           | 0.569  |
|                 | 8 months         | 0.38                     | 0.26   | 0.48                     | 0.26 <sup>c</sup>  | 0.036 | 0.466           | 0.021  |
| <i>p</i> -value |                  | 0.686                    | 0.344  | 0.548                    | <0.001             |       |                 |        |
| C24:1           | 5 months         | 0.02 <sup>b</sup>        | 0.14   | 0.30                     | 0.14               | 0.034 | 0.032           | 0.705  |
|                 | 6 months         | 0.37 <sup>a</sup>        | 0.25   | 0.18                     | 0.19               | 0.041 | 0.138           | 0.468  |
|                 | 7 months         | 0.11 <sup>b</sup>        | 0.23   | 0.16                     | 0.13               | 0.033 | 0.696           | 0.568  |
|                 | 8 months         | 0.22 <sup>ab</sup>       | 0.31   | 0.13                     | 0.14               | 0.036 | 0.065           | 0.479  |
| <i>p</i> -value |                  | 0.014                    | 0.442  | 0.371                    | 0.899              |       |                 |        |
| ΣMUFA           | 5 months         | 38.34 <sup>ab</sup>      | 41.83  | 35.98 <sup>c</sup>       | 42.31              | 0.643 | 0.321           | <0.001 |
|                 | 6 months         | 40.22 <sup>a</sup>       | 44.07  | 41.42 <sup>a</sup>       | 44.88              | 0.647 | 0.394           | 0.004  |
|                 | 7 months         | 36.36 <sup>b</sup>       | 44.08  | 40.07 <sup>ab</sup>      | 45.35              | 0.774 | 0.013           | <0.001 |
|                 | 8 months         | 38.04 <sup>ab</sup>      | 43.07  | 37.15 <sup>bc</sup>      | 44.56              | 0.759 | 0.777           | <0.001 |
| <i>p</i> -value |                  | 0.049                    | 0.230  | 0.020                    | 0.148              |       |                 |        |

Abbreviations: MUFA: monounsaturated fatty acids; SEM: standard error of the mean; values with different superscript letters (a, b, c) within the same column per fixed effect (age of slaughter) differ significantly ( $p < 0.05$ ). The effect of interaction between “Breed” and “Gender” was not significant; therefore, significance is only presented for main effects.

**Table S10.** Polyunsaturated fatty acid profile of thigh meat at different slaughter ages (g/100g of total fatty acids) (n = 8).

| Items          | Age at slaughter | <i>Bionda Piemontese</i> |                   | <i>Bianca di Saluzzo</i> |                   | SEM   | <i>p-value</i> |        |
|----------------|------------------|--------------------------|-------------------|--------------------------|-------------------|-------|----------------|--------|
|                |                  | Male                     | Female            | Male                     | Female            |       | Breed          | Gender |
| C18 :2n6       | 5 months         | 4.59                     | 2.98 <sup>a</sup> | 4.92                     | 3.07 <sup>a</sup> | 0.316 | 0.716          | 0.006  |
|                | 6 months         | 4.10                     | 2.13 <sup>b</sup> | 3.27                     | 2.16 <sup>b</sup> | 0.225 | 0.275          | <0.001 |
|                | 7 months         | 4.12                     | 1.72 <sup>b</sup> | 4.21                     | 1.35 <sup>c</sup> | 0.280 | 0.645          | <0.001 |
|                | 8 months         | 4.69                     | 2.03 <sup>b</sup> | 6.48                     | 2.11 <sup>b</sup> | 0.495 | 0.232          | <0.001 |
| <i>p-value</i> |                  | 0.719                    | 0.001             | 0.110                    | <0.001            |       |                |        |
| C20 :2n6       | 5 months         | 0.03                     | 0.02 <sup>a</sup> | 0.02                     | 0.02              | 0.007 | 0.781          | 0.968  |
|                | 6 months         | 0.04                     | 0.00 <sup>b</sup> | 0.01                     | 0.00              | 0.006 | 0.236          | 0.065  |
|                | 7 months         | 0.00                     | 0.00 <sup>b</sup> | 0.01                     | 0.00              | 0.002 | 0.165          | 0.165  |
|                | 8 months         | 0.03                     | 0.00 <sup>b</sup> | 0.04                     | 0.01              | 0.010 | 0.755          | 0.112  |
| <i>p-value</i> |                  | 0.595                    | 0.004             | 0.438                    | 0.290             |       |                |        |
| C20: 4n6       | 5 months         | 0.46                     | 0.49 <sup>a</sup> | 1.80 <sup>a</sup>        | 1.13              | 0.210 | 0.017          | 0.427  |
|                | 6 months         | 0.43                     | 0.13 <sup>b</sup> | 0.44 <sup>b</sup>        | 0.18              | 0.046 | 0.719          | 0.002  |
|                | 7 months         | 0.49                     | 0.12 <sup>b</sup> | 0.45 <sup>b</sup>        | 0.07              | 0.058 | 0.655          | 0.001  |
|                | 8 months         | 0.66                     | 0.11 <sup>b</sup> | 0.37 <sup>b</sup>        | 0.45              | 0.089 | 0.882          | 0.168  |
| <i>p-value</i> |                  | 0.702                    | 0.041             | 0.003                    | 0.063             |       |                |        |
| Σn6 PUFA       | 5 months         | 5.08                     | 3.49 <sup>a</sup> | 6.73 <sup>a</sup>        | 4.23 <sup>a</sup> | 0.358 | 0.056          | 0.002  |
|                | 6 months         | 4.57                     | 2.26 <sup>b</sup> | 3.72 <sup>b</sup>        | 2.35 <sup>b</sup> | 0.271 | 0.389          | <0.001 |
|                | 7 months         | 4.61                     | 1.84 <sup>b</sup> | 4.67 <sup>ab</sup>       | 1.42 <sup>c</sup> | 0.323 | 0.624          | <0.001 |
|                | 8 months         | 5.39                     | 2.14 <sup>b</sup> | 6.90 <sup>a</sup>        | 2.56 <sup>b</sup> | 0.502 | 0.207          | <0.001 |
| <i>p-value</i> |                  | 0.674                    | 0.001             | 0.045                    | <0.001            |       |                |        |
| C18 :3n3       | 5 months         | 0.08                     | 0.09              | 0.22                     | 0.15              | 0.025 | 0.057          | 0.514  |
|                | 6 months         | 0.19                     | 0.08              | 0.13                     | 0.10              | 0.025 | 0.782          | 0.188  |
|                | 7 months         | 0.17                     | 0.12              | 0.12                     | 0.06              | 0.024 | 0.293          | 0.240  |
|                | 8 months         | 0.13                     | 0.09              | 0.05                     | 0.03              | 0.018 | 0.061          | 0.468  |
| <i>p-value</i> |                  | 0.652                    | 0.800             | 0.170                    | 0.104             |       |                |        |
| C20 :5n3       | 5 months         | 0.00                     | 0.09              | 0.00                     | 0.07              | 0.022 | 0.793          | 0.079  |
|                | 6 months         | 0.00                     | 0.29              | 0.07                     | 0.06              | 0.064 | 0.542          | 0.281  |
|                | 7 months         | 0.00                     | 0.13              | 0.00                     | 0.05              | 0.026 | 0.484          | 0.085  |
|                | 8 months         | 0.11                     | 0.27              | 0.00                     | 0.01              | 0.056 | 0.102          | 0.461  |
| <i>p-value</i> |                  | 0.407                    | 0.757             | 0.407                    | 0.693             |       |                |        |
| C22 :5n3       | 5 months         | 0.00                     | 0.00              | 0.04 <sup>b</sup>        | 0.15              | 0.028 | 0.103          | 0.335  |
|                | 6 months         | 0.00                     | 0.11              | 0.00 <sup>b</sup>        | 0.00              | 0.029 | 0.326          | 0.326  |
|                | 7 months         | 0.00                     | 0.00              | 0.00 <sup>b</sup>        | 0.00              | -     | -              | -      |
|                | 8 months         | 0.00                     | 0.00              | 0.62 <sup>a</sup>        | 0.00              | 0.097 | 0.094          | 0.094  |
| <i>p-value</i> |                  | -                        | 0.407             | 0.055                    | 0.132             |       |                |        |
| C22 :6n3       | 5 months         | 0.24 <sup>a</sup>        | 0.00              | 0.00 <sup>b</sup>        | 0.12              | 0.041 | 0.441          | 0.441  |
|                | 6 months         | 0.00 <sup>b</sup>        | 0.12              | 0.00 <sup>b</sup>        | 0.00              | 0.030 | 0.326          | 0.326  |
|                | 7 months         | 0.00 <sup>b</sup>        | 0.00              | 0.00 <sup>b</sup>        | 0.00              | -     | -              | -      |

|                       |          |                   |                   |                    |                    |       |       |        |
|-----------------------|----------|-------------------|-------------------|--------------------|--------------------|-------|-------|--------|
|                       | 8 months | 0.00 <sup>b</sup> | 0.00              | 0.94 <sup>a</sup>  | 0.00               | 0.146 | 0.090 | 0.090  |
| <b><i>p</i>-value</b> |          | 0.028             | 0.407             | 0.043              | 0.132              |       |       |        |
| Σn3 PUFA              | 5 months | 0.32              | 0.19              | 0.25               | 0.51 <sup>a</sup>  | 0.059 | 0.263 | 0.631  |
|                       | 6 months | 0.19              | 0.60              | 0.20               | 0.16 <sup>b</sup>  | 0.081 | 0.187 | 0.238  |
|                       | 7 months | 0.17              | 0.25              | 0.12               | 0.12 <sup>b</sup>  | 0.037 | 0.257 | 0.667  |
|                       | 8 months | 0.24              | 0.36              | 1.60               | 0.04 <sup>b</sup>  | 0.242 | 0.262 | 0.126  |
| <b><i>p</i>-value</b> |          | 0.753             | 0.369             | 0.078              | 0.011              |       |       |        |
| ΣPUFA                 | 5 months | 5.40              | 3.67 <sup>a</sup> | 6.99 <sup>ab</sup> | 4.74 <sup>a</sup>  | 0.379 | 0.053 | 0.005  |
|                       | 6 months | 4.76              | 2.87 <sup>b</sup> | 3.93 <sup>c</sup>  | 2.51 <sup>bc</sup> | 0.267 | 0.201 | 0.001  |
|                       | 7 months | 4.79              | 2.09 <sup>b</sup> | 4.80 <sup>bc</sup> | 1.54 <sup>c</sup>  | 0.319 | 0.458 | <0.001 |
|                       | 8 months | 5.63              | 2.50 <sup>b</sup> | 8.50 <sup>a</sup>  | 2.60 <sup>b</sup>  | 0.564 | 0.052 | <0.001 |
| <b><i>p</i>-value</b> |          | 0.623             | 0.002             | 0.004              | <0.001             |       |       |        |

Abbreviations: PUFA: polyunsaturated fatty acids; SEM: standard error of the mean; values with different superscript letters (a, b, c) within the same column per fixed effect (age of slaughter) differ significantly ( $p < 0.05$ ). The effect of interaction between “Breed” and “Gender” was not significant; therefore, significance is only presented for main effects.
